# Supplementary material for: Structural alterations and inflammation in the heart after multiple trauma followed by reamed versus non-reamed femoral nailing
Source: PubMed Central journal article supplement (PMC7316303; doi:10.1371/journal.pone.0235220), 2020-06-25
Supplement: pone.0235220.s002.pdf [file pone.0235220.s002.pdf]

|                         | sham          | reamed                                                                             | non-reamed                                                           |
|-------------------------|---------------|------------------------------------------------------------------------------------|----------------------------------------------------------------------|
| Cx43 (mRNA)             | -             | -                                                                                  | reduced at the surface layers of the left ventricle compared to sham |
| Cx43 (protein)          | no difference | no difference                                                                      | no difference                                                        |
| Cx40 (mRNA)             | -             | -                                                                                  | reduced at the surface layers of the left ventricle compared to sham |
| Cx45 (mRNA)             | no difference | no difference                                                                      | no difference                                                        |
| Alpha-actinin (protein) | no difference | no difference                                                                      | no difference                                                        |
| Alpha-actinin (mRNA)    | -             | reduced at the luminal layer of the left ventricle compared to sham and non-reamed | -                                                                    |
| Desmin (protein)        | no difference | no difference                                                                      | no difference                                                        |
| Desmin (mRNA)           | -             | reduced at the superficial layers of the left ventricle compared to sham           | -                                                                    |
| IL-1 $\beta$ (mRNA)     | no difference | no difference                                                                      | no difference                                                        |
| IL-6 (protein)          | no difference | no difference                                                                      | no difference                                                        |
| IL-6 (mRNA)             | -             | increased at the superficial layer of the left ventricle compared to non-reamed    | -                                                                    |
| Nitrotyrosine (protein) | -             | increased at the superficial layer of the left ventricle compared to sham          | -                                                                    |

|                            |               |                                                                                  |                                                                          |
|----------------------------|---------------|----------------------------------------------------------------------------------|--------------------------------------------------------------------------|
| HMGB-1<br>(systemically)   | -             | increased 6h after<br>trauma                                                     | increased 4 and 6h<br>after trauma                                       |
| Histones<br>(systemically) | -             | increased 6h after<br>trauma                                                     | increased 4h after<br>trauma                                             |
| RyR1 (mRNA)                | -             | -                                                                                | reduced at luminal<br>layer of the left<br>ventricle compared<br>to sham |
| SERCA (mRNA)               | -             | increased at luminal<br>layer of the left<br>ventricle compared<br>to non-reamed | -                                                                        |
| NCX (mRNA)                 | no difference | no difference                                                                    | no difference                                                            |
