# Supplementary material for: Structural alterations and inflammation in the heart after multiple trauma followed by reamed versus non-reamed femoral nailing
Source: PubMed Central journal article supplement (PMC7316303; doi:10.1371/journal.pone.0235220), 2020-06-25

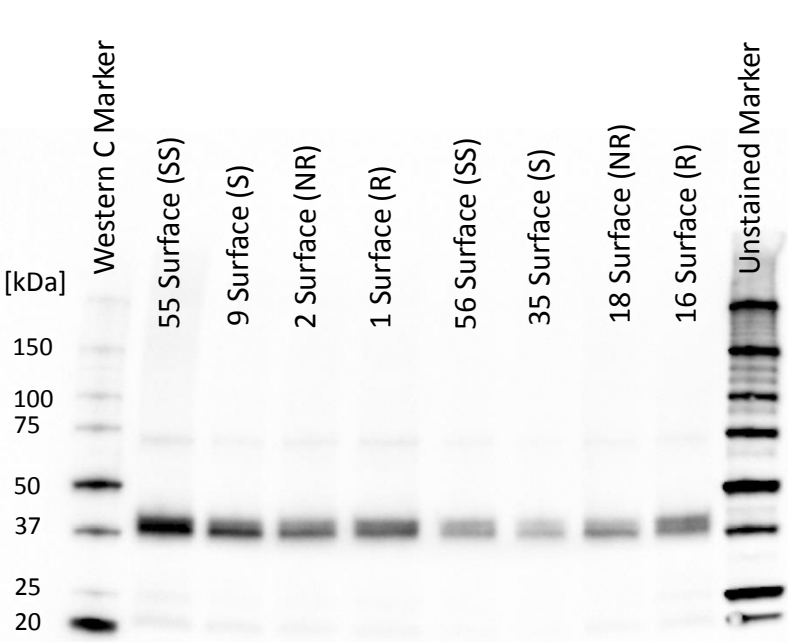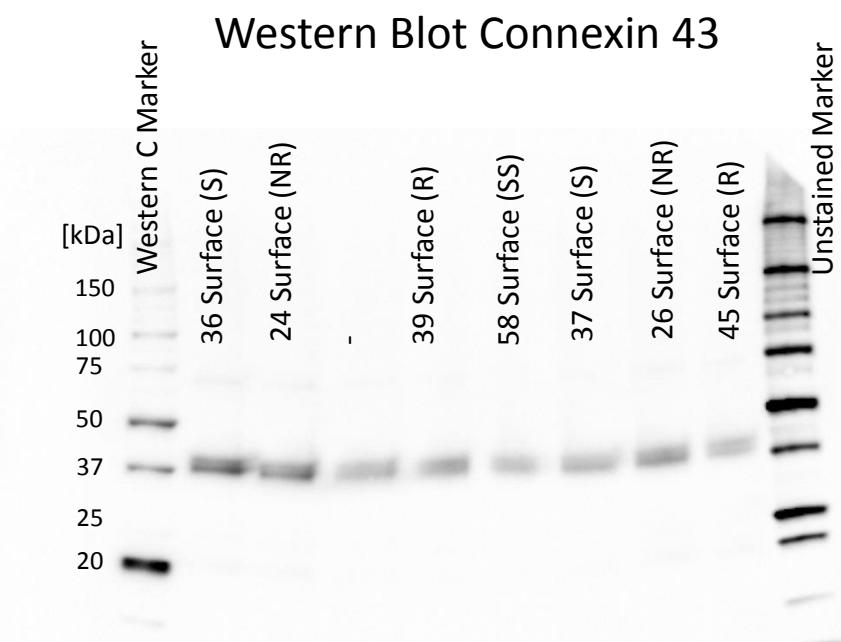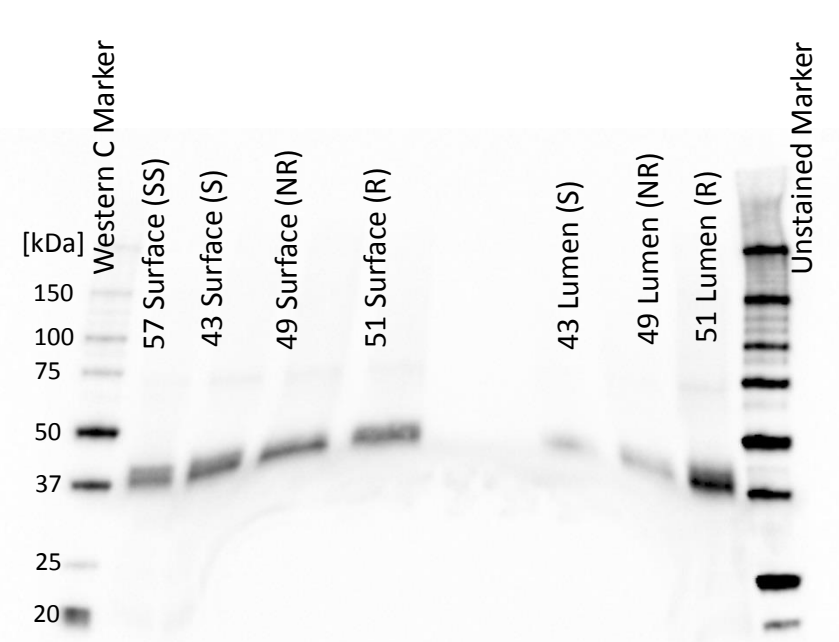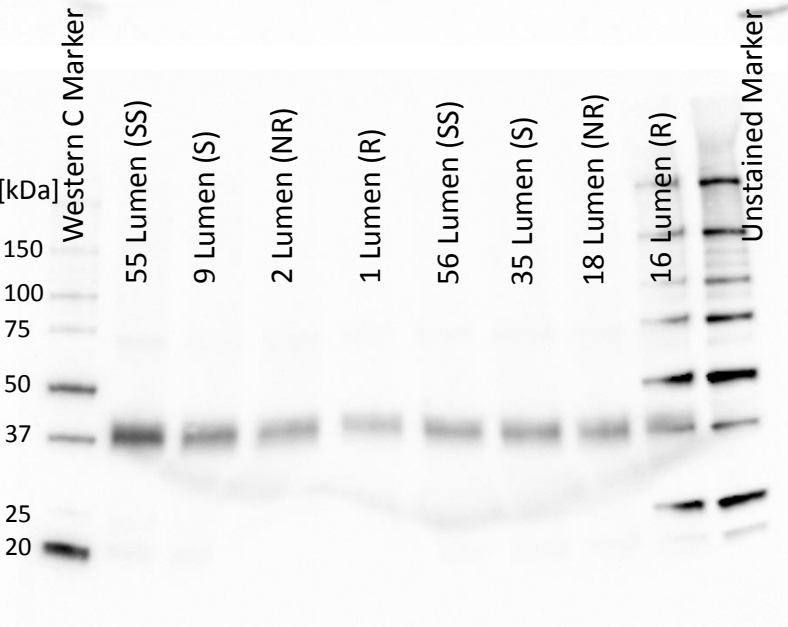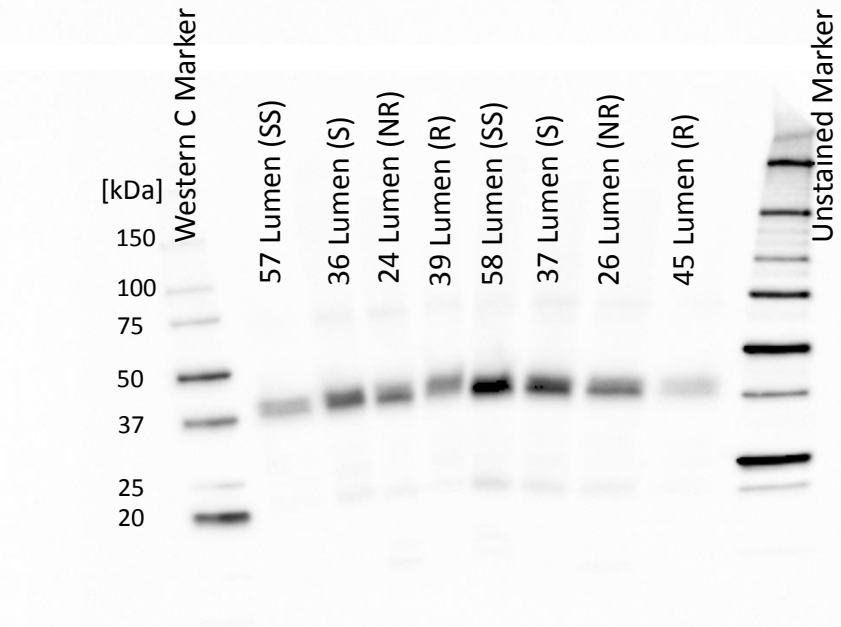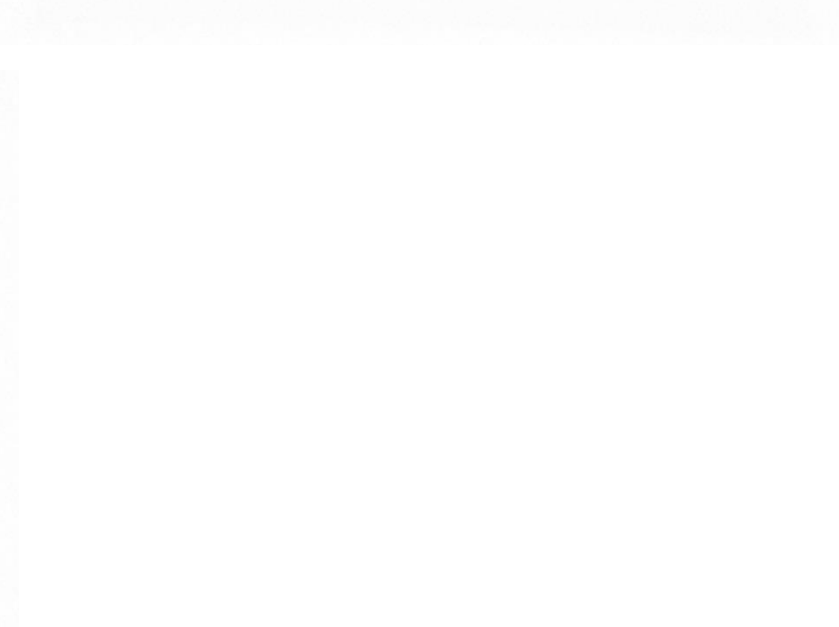

# Western Blot Interleukin-6

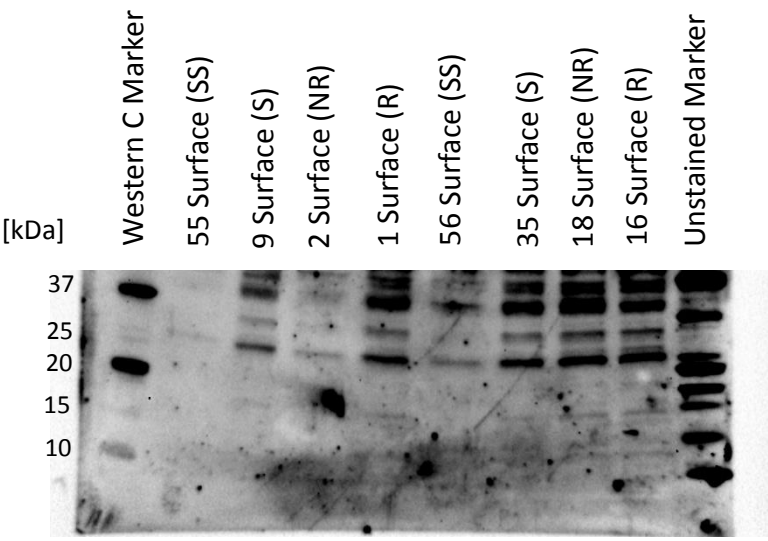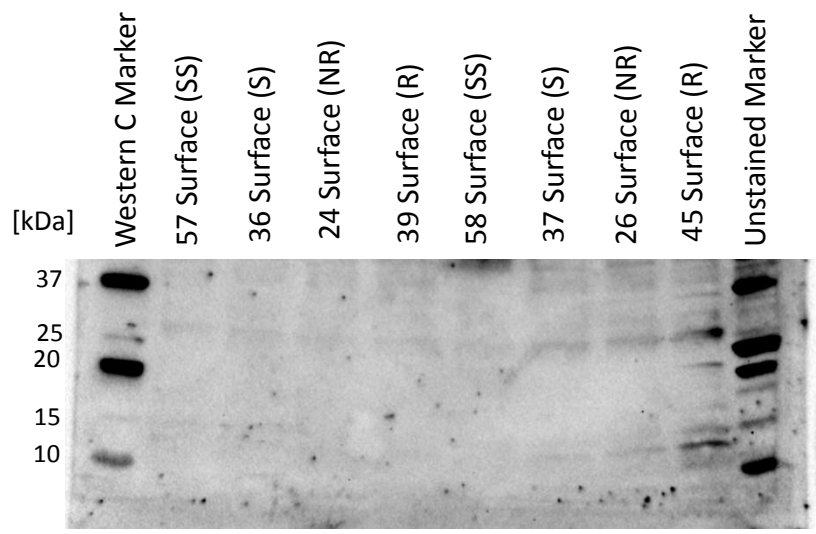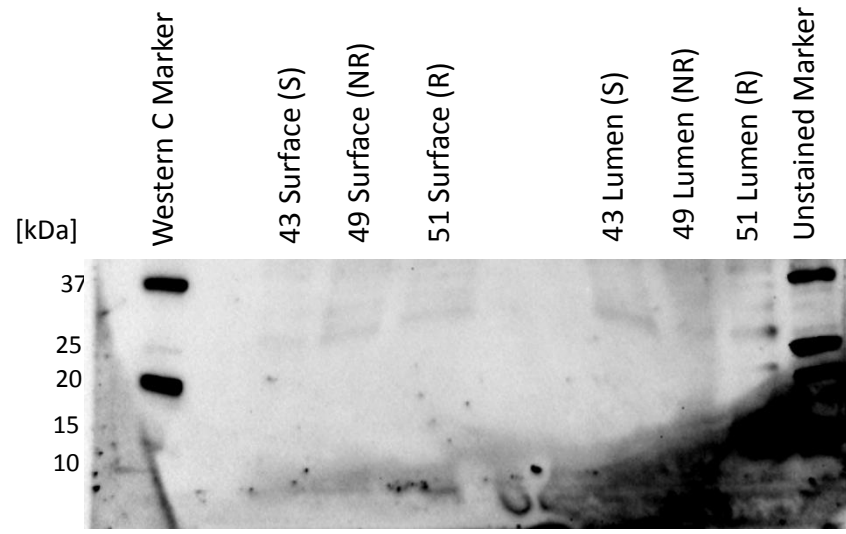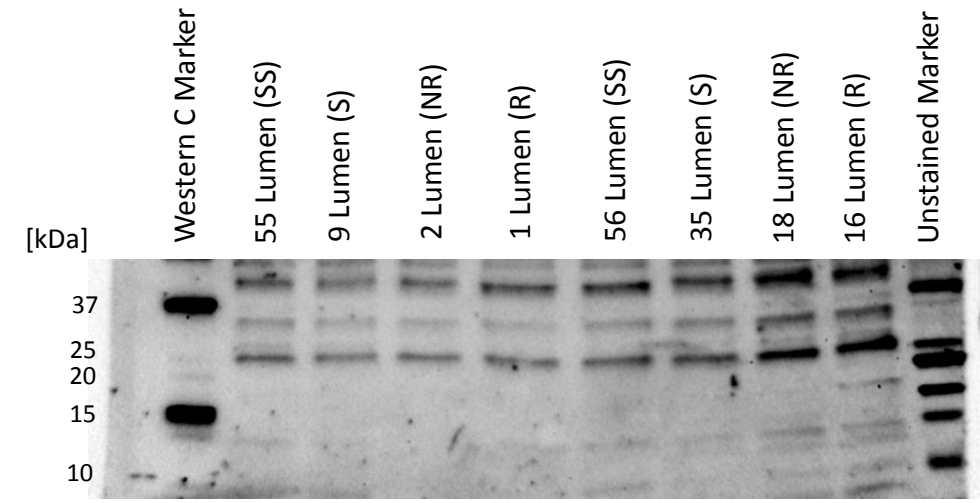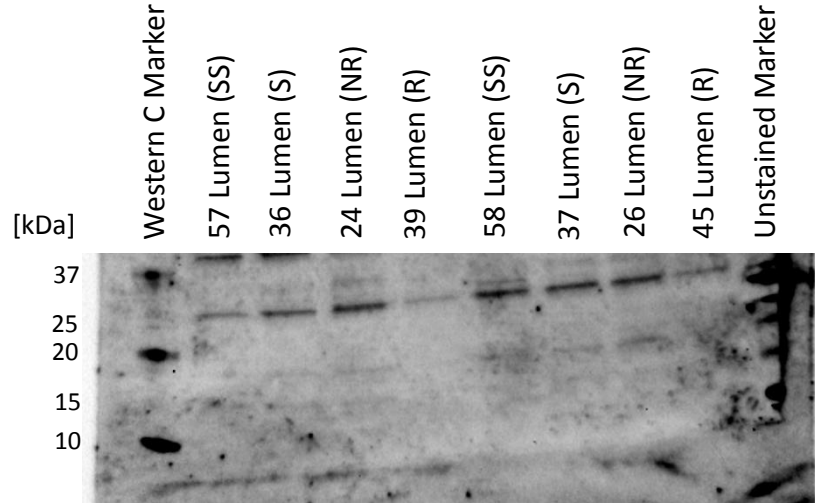

Supplement: pone.0235220.s003.pdf [file pone.0235220.s003.pdf]
